# Supplementary material for: Visible light induced photocatalytic activity of sulfur doped hollow TiO2 nanoparticles, synthesized via a novel route
Source: Royal Society of Chemistry journal article supplement (doi:10.1039/c3dt53311e), 2014-01-01
Supplement: c3dt53311e1.pdf [file c3dt53311e1.pdf]

## **Visible light induced photocatalytic activity of sulfur doped hollow TiO<sub>2</sub> nanoparticles, synthesized via a novel route**

Rajib Ghosh Chaudhuri and Santanu Paria\*

Interfaces and Nanomaterials Laboratory, Department of Chemical Engineering, National  
Institute of Technology  
Rourkela 769008, Orissa, India.

\*Email: [santanuparia@yahoo.com](mailto:santanuparia@yahoo.com), [sparia@nitrkl.ac.in](mailto:sparia@nitrkl.ac.in)

### **Supporting information**

#### **Particles characterized by fluorescence spectroscopy.**

Fluorescence spectroscopy is another characterization technique that gives the direct information about the band gap and quantum yield property of the material. Fig. S1 (ESI†) shows fluorescence emission spectrum of S doped hollow TiO<sub>2</sub> nanoparticles. The sample was excited at 295 nm wavelength and measured the emission spectra of the material. The synthesized hollow particles shows a distinct sharp peak at 593.6 nm wavelength with an impressive full width at half-maximum (FWHM) as small as 9.1 nm, which could be attributed to the narrow size distribution of the particles. The band gap of the S doped hollow TiO<sub>2</sub> was calculated from the emission spectra and found to be 2.09 eV, the obtained value is in good agreement with the value of 2.50 eV obtained by UV-Vis spectroscopy technique. The quantum yield (*QY*) was calculated for these particles by using phenol as a standard material (*QY* = 0.14 ± 0.01).<sup>1</sup> The fitting equation of integrated intensity vs. absorbance and the quantum yield of standard phenol, and S doped hollow TiO<sub>2</sub> particles are shown in Table S1 (ESI†).

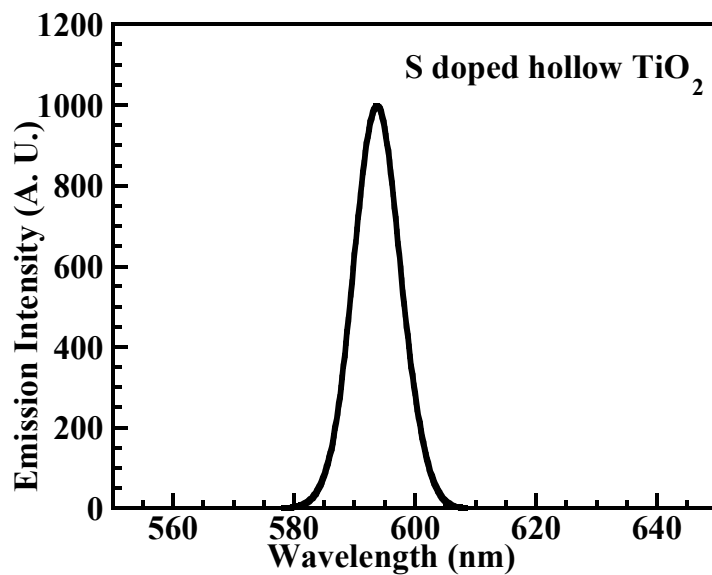

Fig. S1. Fluorescence emission spectra of S doped hollow TiO<sub>2</sub> particles.

Table S1. The fitting equation and R<sup>2</sup> value of integrated intensity vs. absorbance line for phenol and S doped hollow TiO<sub>2</sub> particles form fluorescence spectrum.

| Material                        | Equation               | R <sup>2</sup> | QY     |
|---------------------------------|------------------------|----------------|--------|
| Phenol                          | $y = 111.90x - 310.90$ | 0.939          | 0.14   |
| S doped hollow TiO <sub>2</sub> | $y = 143.97x + 6.14$   | 0.989          | 0.4920 |

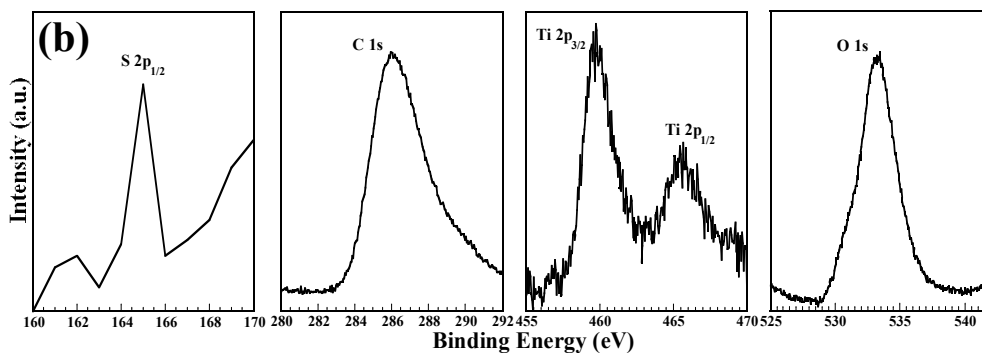

Fig. S2. High resolution XPS patterns of elemental S, C, Ti, and O within the particles.

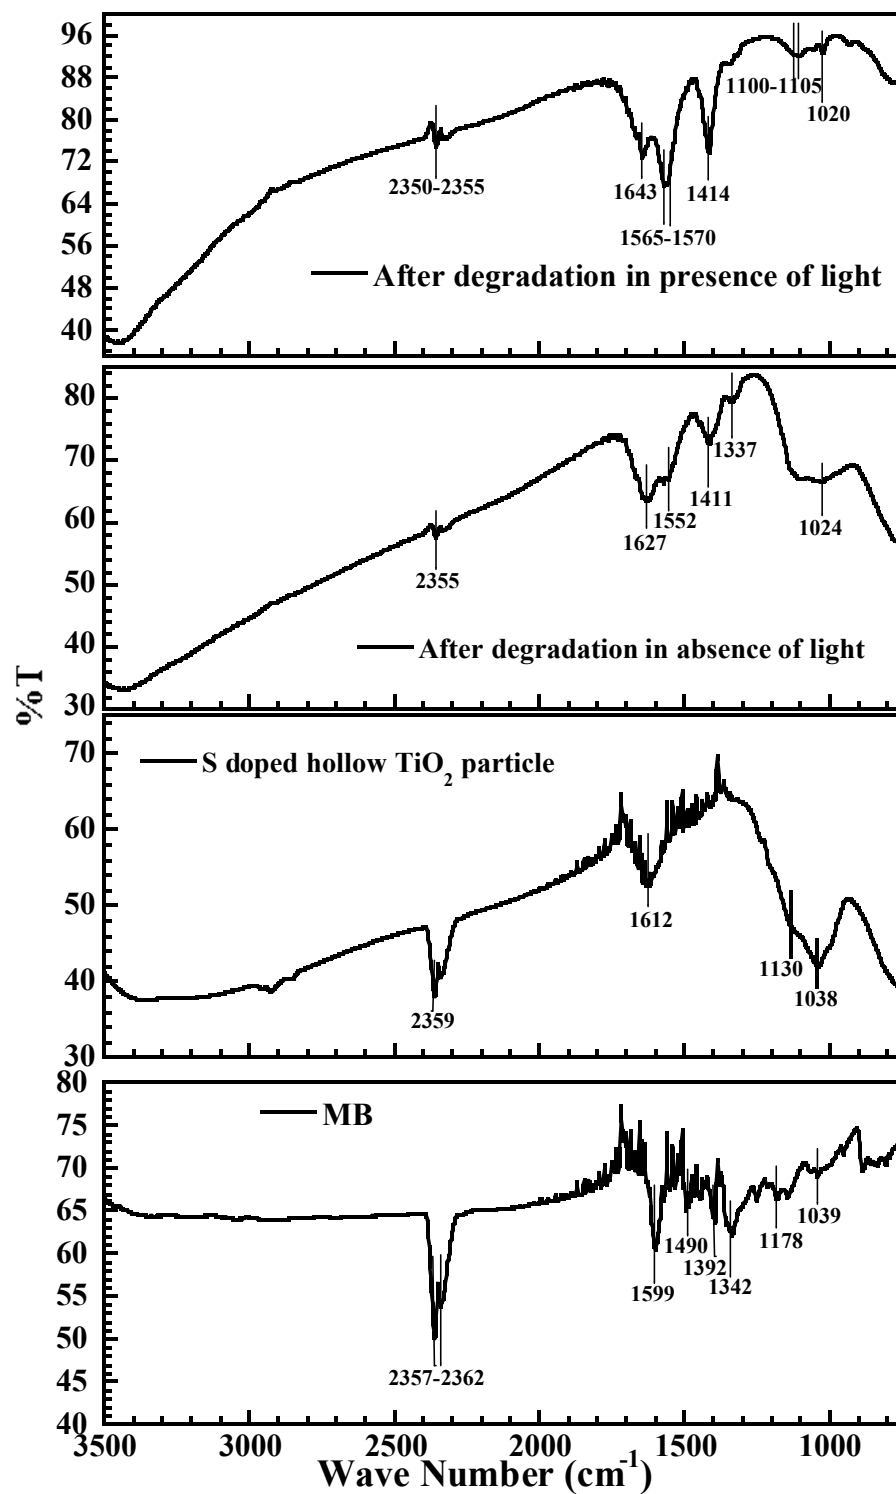

Fig. S3. FT-IR spectrum of MB, S doped hollow  $\text{TiO}_2$  particles, catalyst after exposure of the MB in absence and presence of light.

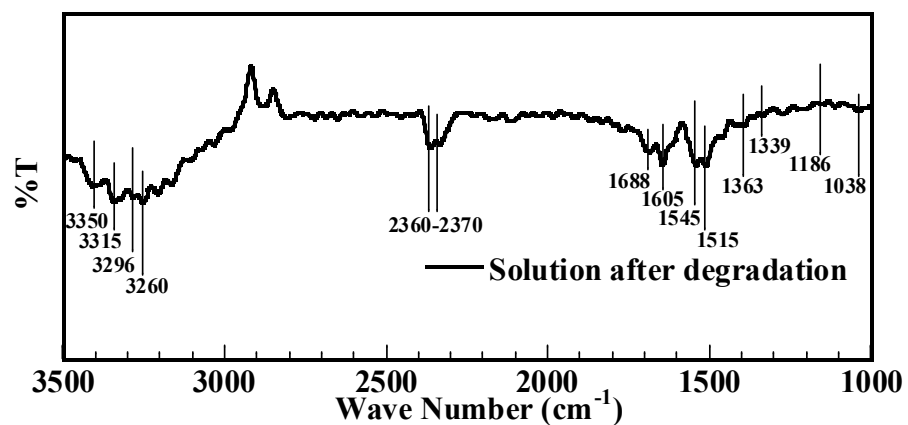

Fig. S4. FT-IR spectrum of solution after degradation.

Table S2. Different parameters (surface area, pore volume, average pore size) of Degussa P25 and S doped hollow TiO<sub>2</sub> catalyst and % removal of MB dye in the presence of both catalysts.

| Particles                          | Surface<br>Area (m <sup>2</sup> /g) | Pore<br>Volume<br>(cm <sup>3</sup> /g) | Avg. Pore<br>Size (nm) | % Degradation<br>in solar light |
|------------------------------------|-------------------------------------|----------------------------------------|------------------------|---------------------------------|
| Degussa P25 <sup>27</sup>          | 63.0                                | 0.06                                   | 3.8                    | 30.0                            |
| S doped hollow<br>TiO <sub>2</sub> | 318.11                              | 0.13                                   | 3.4                    | 98.6                            |

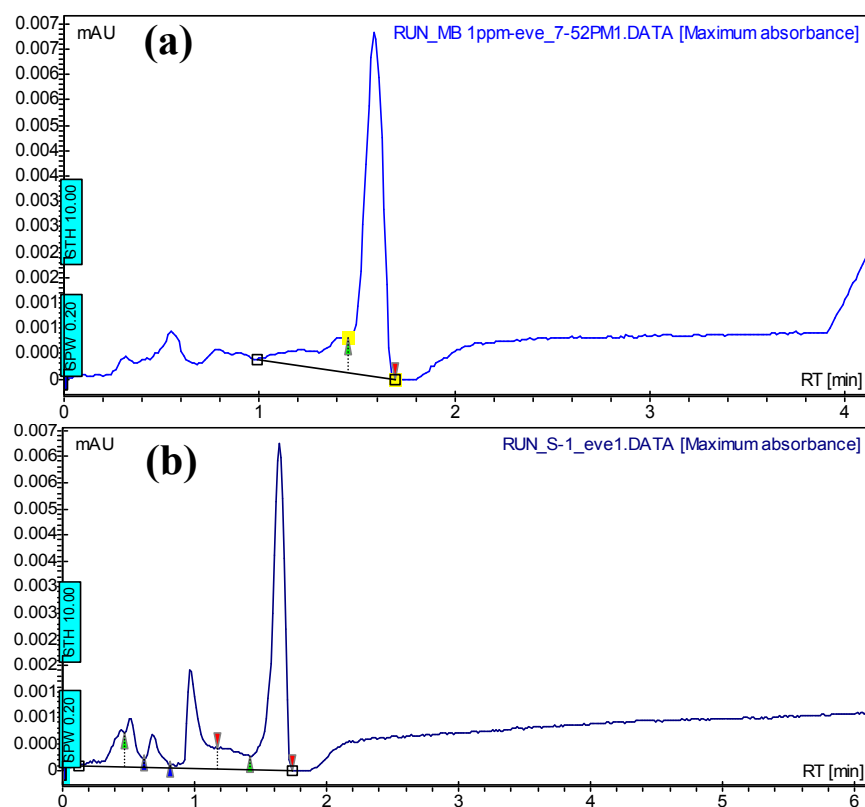

Fig. S5. HPLC spectrum of (a) 1 mg/l MB and (b) 98.6% MB degraded solution.

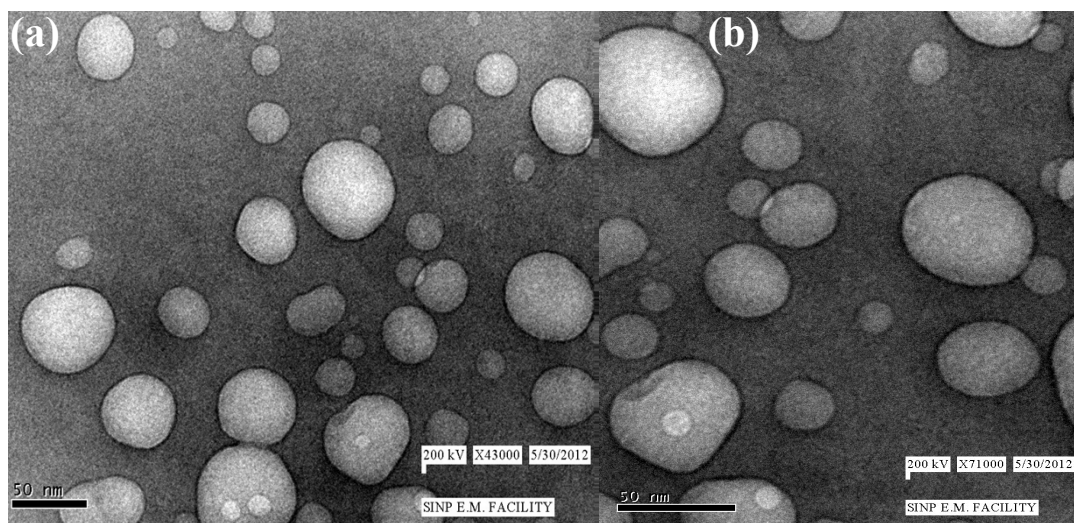

Fig. S6. TEM image of hollow  $\text{TiO}_2$  particles synthesized at 0.01 mM TBOT concentration in 1.2 mM SDBS media. The average size of the particles are 80 nm confirmed by DLS analysis.

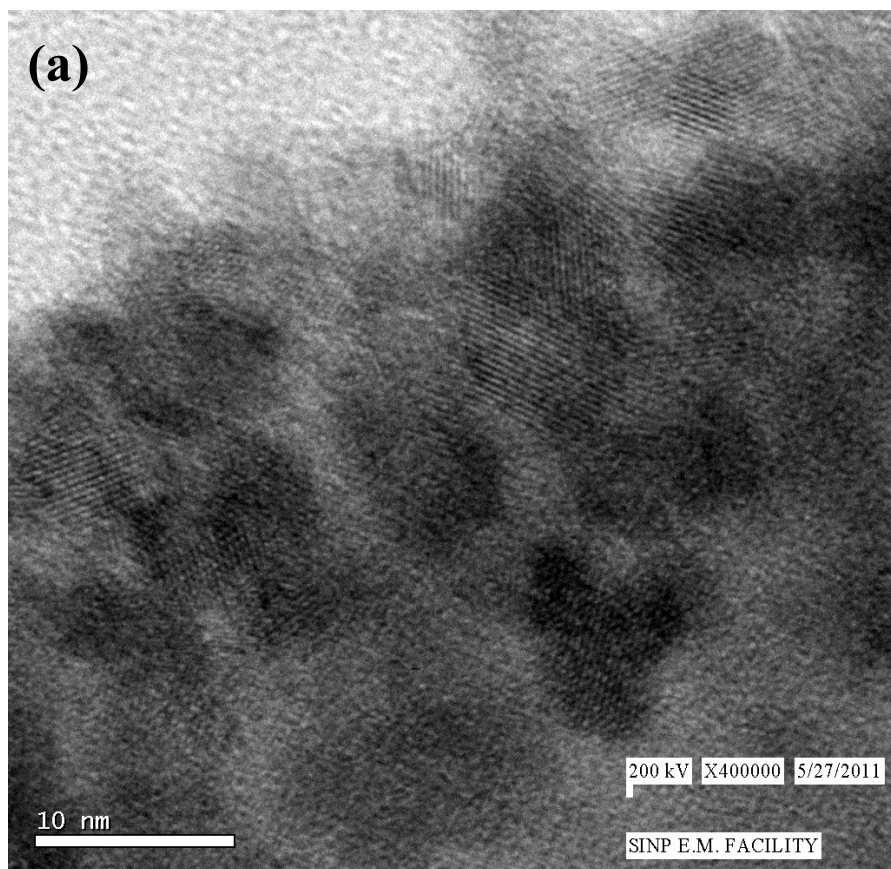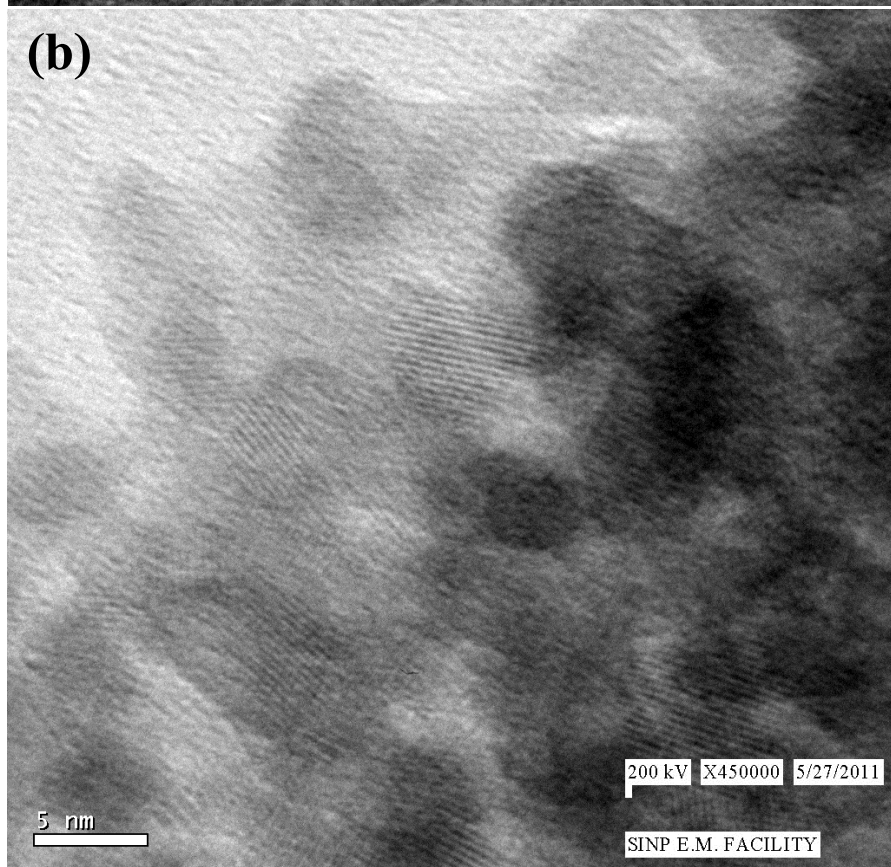

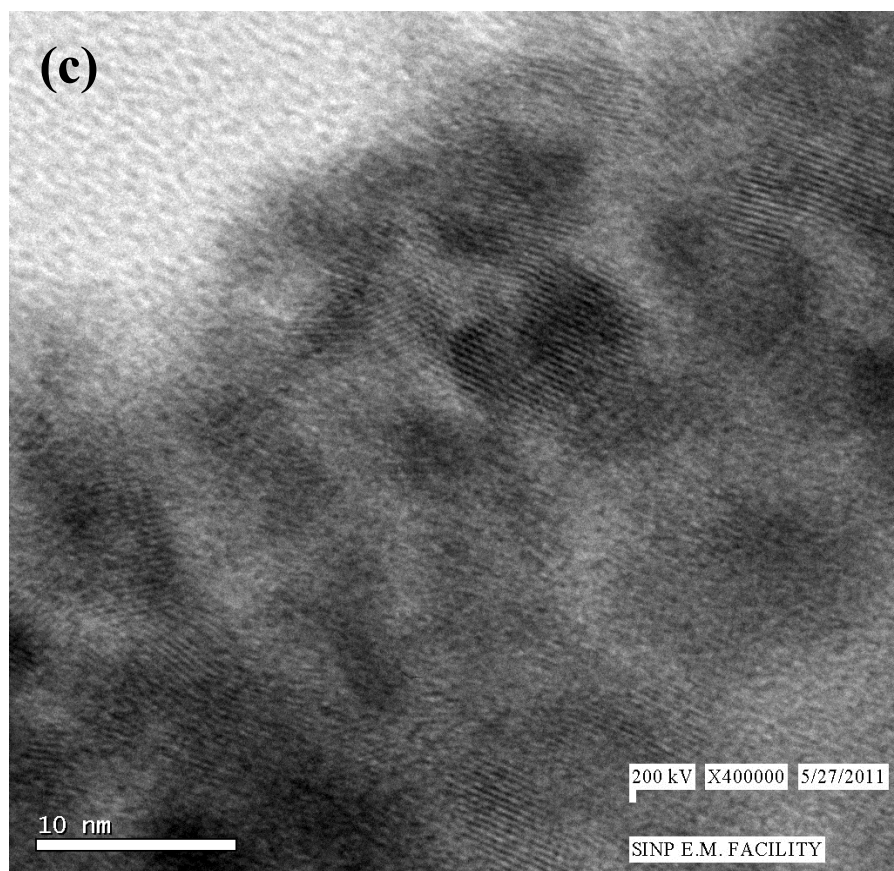

Fig. S7. The high resolution images of the shell layer of hollow  $\text{TiO}_2$  particles at different positions.

## References

- 1 R F Chen. Fluorescence quantum yield of tryptophan and tyrosine *Anal. Lett.*, 1967, **1**, 35–42.
